# Supplementary material for: Modelling clavicular and scapular kinematics: from measurement to simulation
Source: Springer Nature journal article supplement (doi:10.1007/s11517-013-1065-2), 2013-03-29
Supplement: 11517_2013_1065_MOESM1_ESM.pdf [file 11517_2013_1065_MOESM1_ESM.pdf]

Supplementary material for:

“Modelling clavicular and scapular kinematics: from measurement to simulation”

Journal: Medical & Biological Engineering & Computing

Bart Bolsterlee<sup>1</sup>, H.E.J. Veeger<sup>1,2</sup>, F.C.T. van der Helm<sup>1</sup>

<sup>1</sup> Delft University of Technology. Department of Biomechanical Engineering,

<sup>2</sup> Vrije Universiteit Amsterdam, The Netherlands

Corresponding author:

Bart Bolsterlee

E-mail: [b.bolsterlee@tudelft.nl](mailto:b.bolsterlee@tudelft.nl)

Table E1 (see next page)

Coordinates (x,y,z) of relevant anatomical landmarks, thorax dimensions and reference values for motion constraints for the generic model (Generic) and five subjects that we analysed (S1-S5). Landmarks are expressed in the thorax coordinate system and were measured in the anatomical position. All values are in cm, except for scaling factors, which are unitless.
